# Supplementary material for: A portable colorimetric chemosensing regime for ractopamine in chicken samples using μPCD decorated by silver nanoprisms
Source: Royal Society of Chemistry journal article supplement (doi:10.1039/d2ra04793d), 2022-01-01
Supplement: d2ra04793d5.pdf [file d2ra04793d5.pdf]

## Supporting Information

### A portable colorimetric chemosensing regime of ractopamine in chicken samples using $\mu$ PCD decorated by silver nanoprism

Hossein Navay Baghban <sup>a,b</sup>, Mohammad Hasanzadeh <sup>c,d\*</sup>, Yuqian Liu <sup>a</sup>, Farzad Seidi <sup>a,\*\*</sup>

<sup>a</sup> Jiangsu Co-Innovation Center for Efficient Processing and Utilization of Forest Resources and International Innovation Center for Forest Chemicals and Materials, Nanjing Forestry University, Nanjing 210037, China.

<sup>b</sup> Food and Drug safety Research Center, Tabriz University of Medical Sciences, Tabriz, Iran.

<sup>c</sup> Pharmaceutical Analysis Research Center, Tabriz University of Medical Sciences, Tabriz, Iran.

<sup>d</sup> Nutrition Research Center, Tabriz University of Medical Sciences, Tabriz, Iran.

#### Corresponding Author

\* (Mohammad Hasanzadeh) Pharmaceutical Analysis Research Center, Tabriz University of Medical Sciences, Tabriz, Iran.

E-mail address: (\*) [hasanzadehm@tbzmed.ac.ir](mailto:hasanzadehm@tbzmed.ac.ir);

\*\* (Farzad Seidi) Jiangsu Co-Innovation Center for Efficient Processing and Utilization of Forest Resources and International Innovation Center for Forest Chemicals and Materials, Nanjing Forestry University, Nanjing 210037, China.

E-mail address: [f\\_seidi@njfu.edu.cn](mailto:f_seidi@njfu.edu.cn)

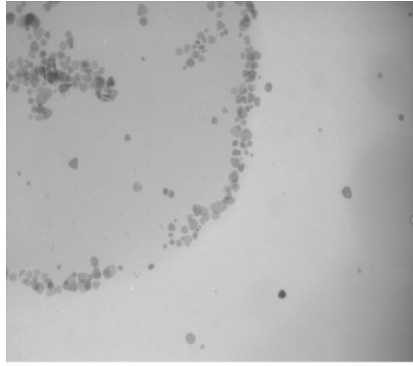

30 nm

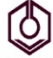

Drug Applied Research Center

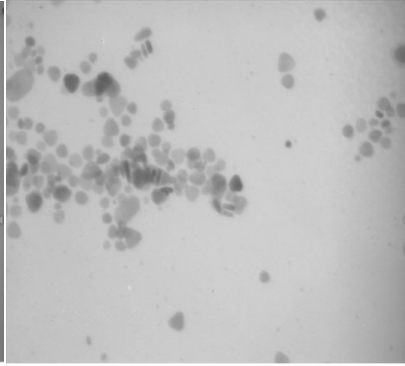

30 nm

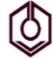

Drug Applied Research Center

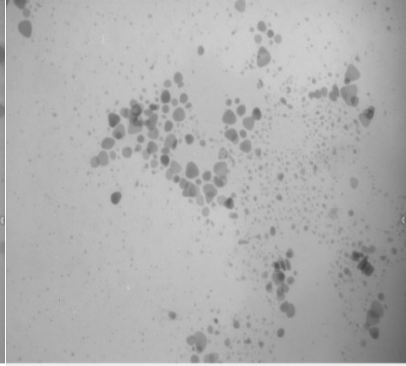

30 nm

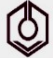

Drug Applied Research Center

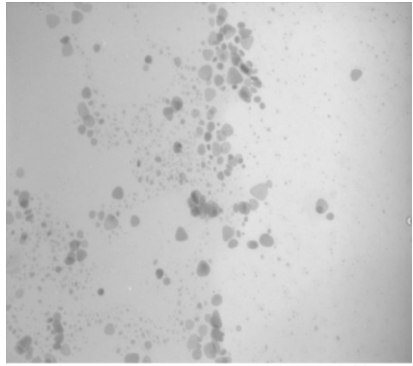

30 nm

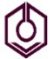

Drug Applied Research Center

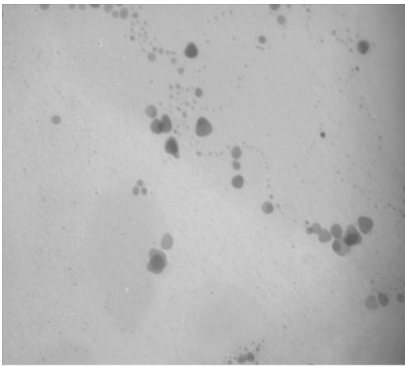

20 nm

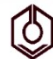

Drug Applied Research Center

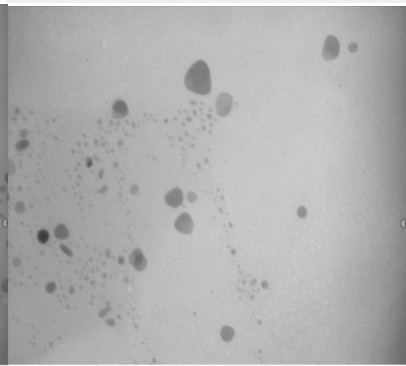

20 nm

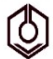

Drug Applied Research Center

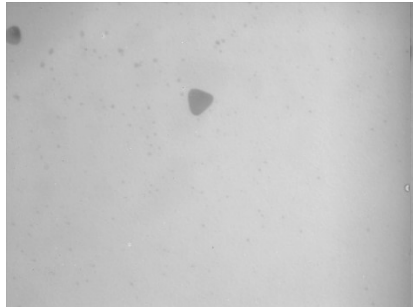

20 nm

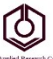

Drug Applied Research Center

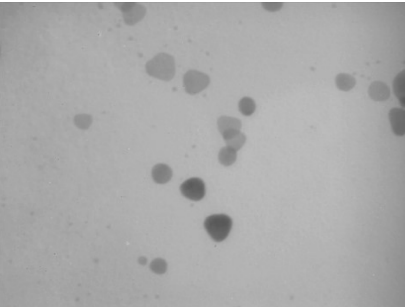

20 nm

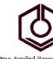

Drug Applied Research Center

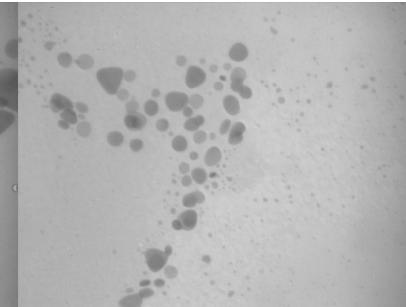

15 nm

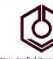

Drug Applied Research Center

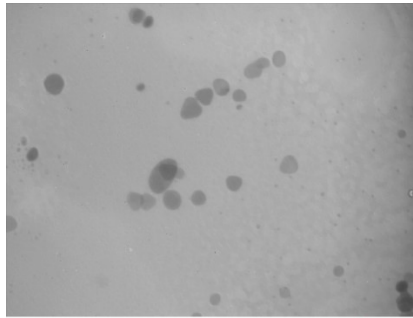

15 nm

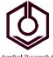

Drug Applied Research Center

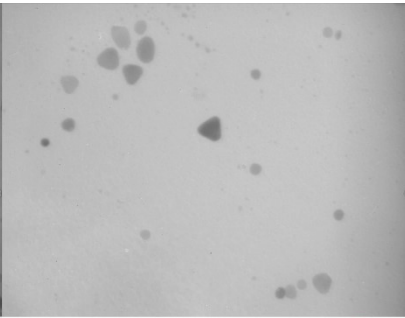

15 nm

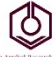

Drug Applied Research Center

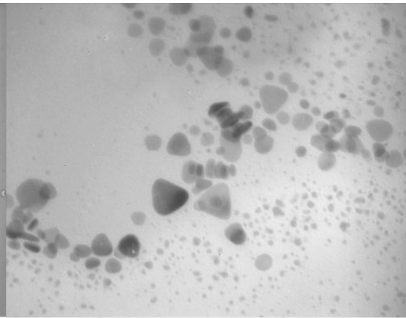

15 nm

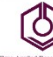

Drug Applied Research Center

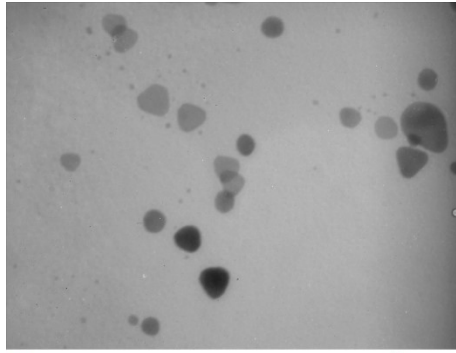

10 nm

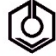

Dug Applied Research Center

**Fig S1.** TEM images of Ag NPs in 30, 20, 15, and 10 nm scales.

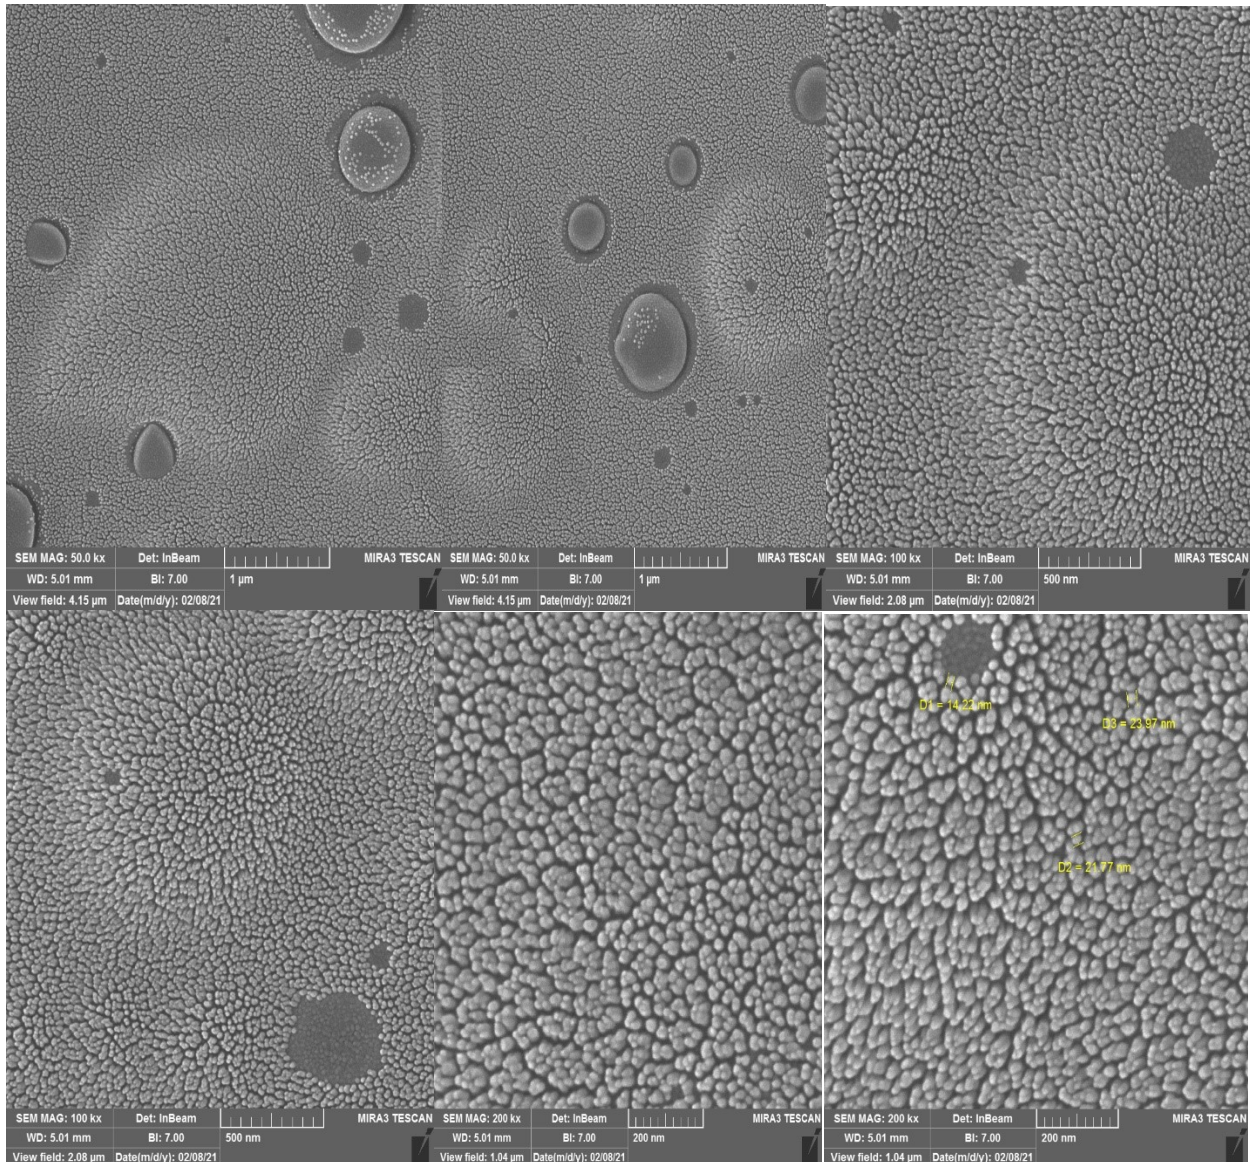



**Fig S2.** FE-SEM Images of AgNPrs from view field of 4.15  $\mu\text{m}$  to 1.04  $\mu\text{m}$ .

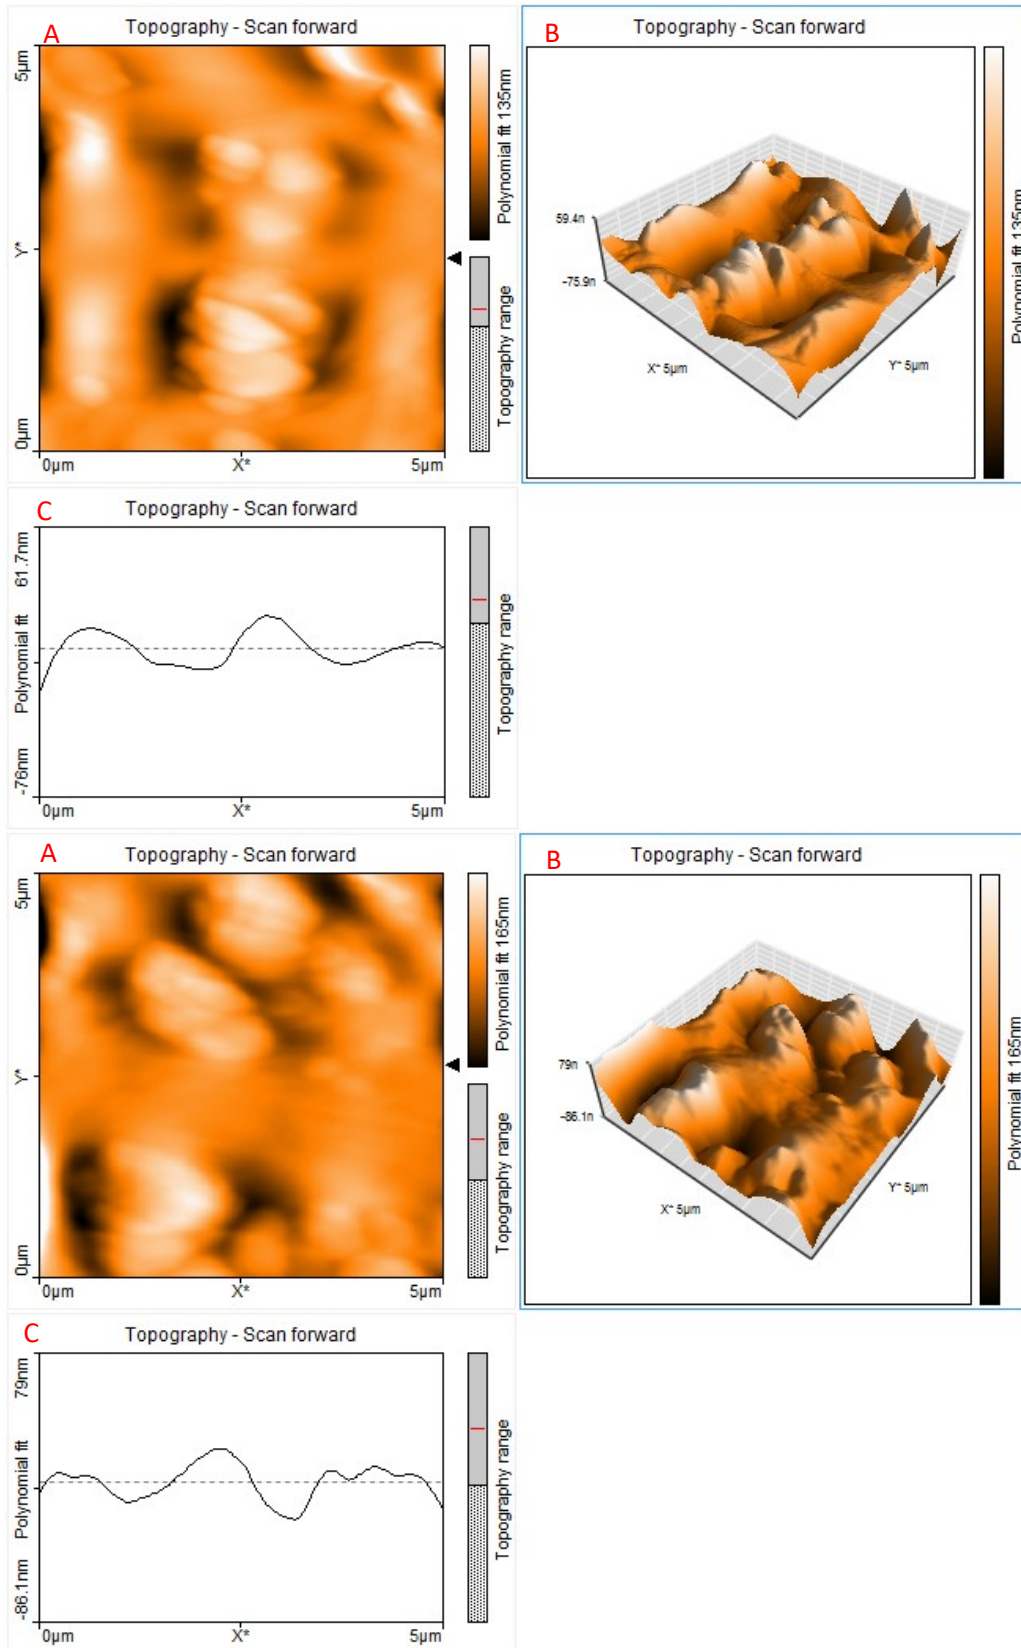

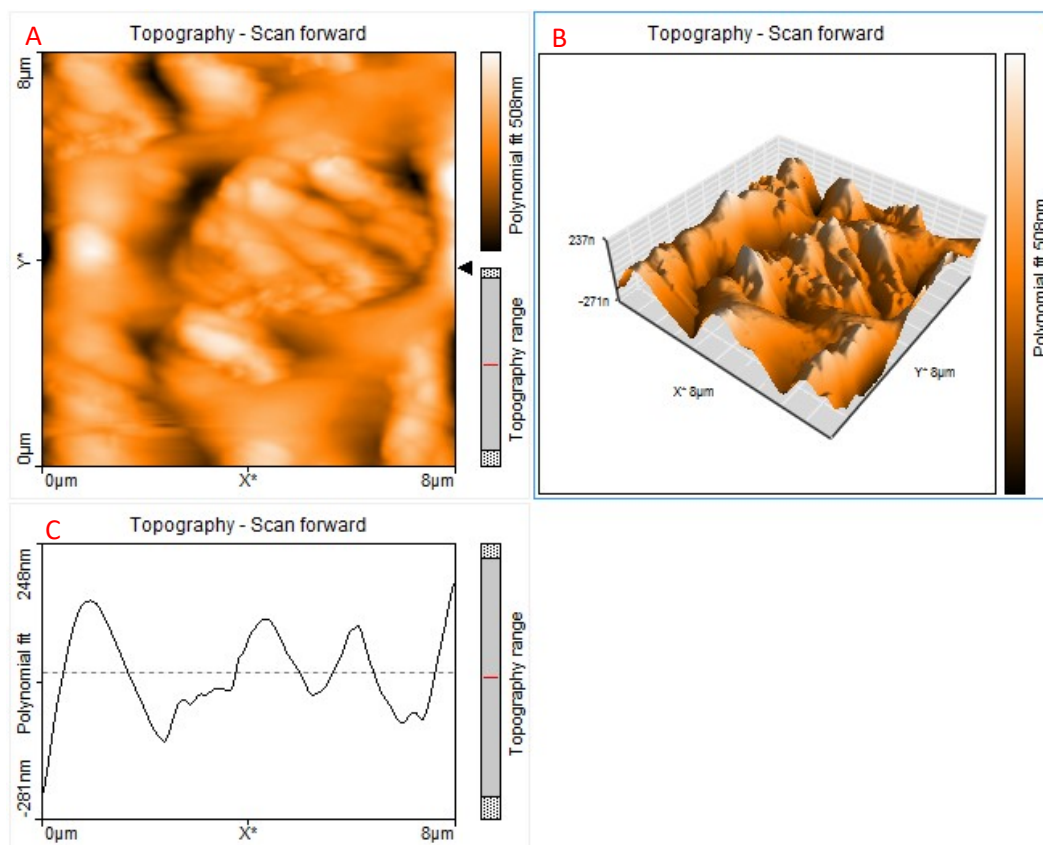

**Fig S3.** Topographic AFM graphs in 2D (A and C) and 3D (B) visualization of Ag NPRs.

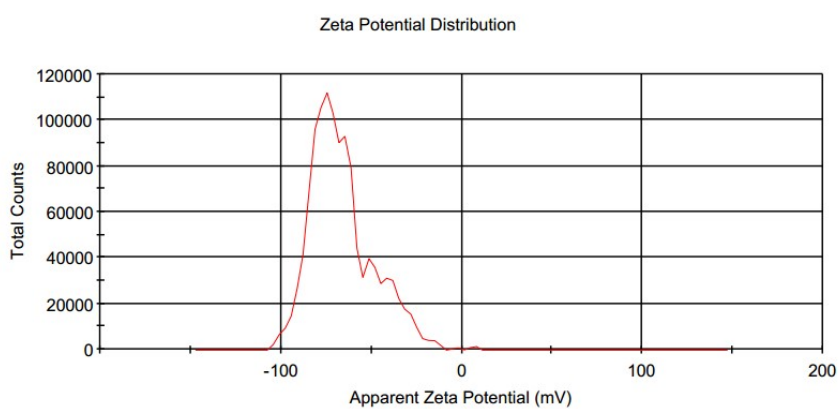

**Fig S4.** Zeta potential of Ag NPRs.

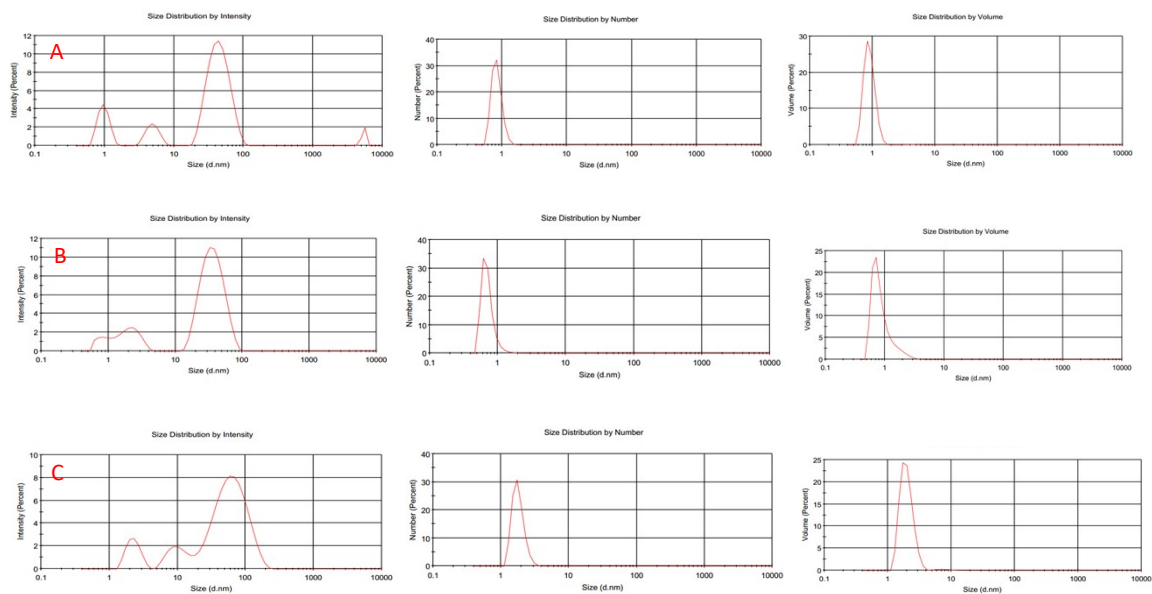

**Fig. S5.** DLS plote of A) Ag NPrs, B) combination of Ag NPrs and RAC immediately, C) combination of Ag NPrs and RAC after 20 minutes.

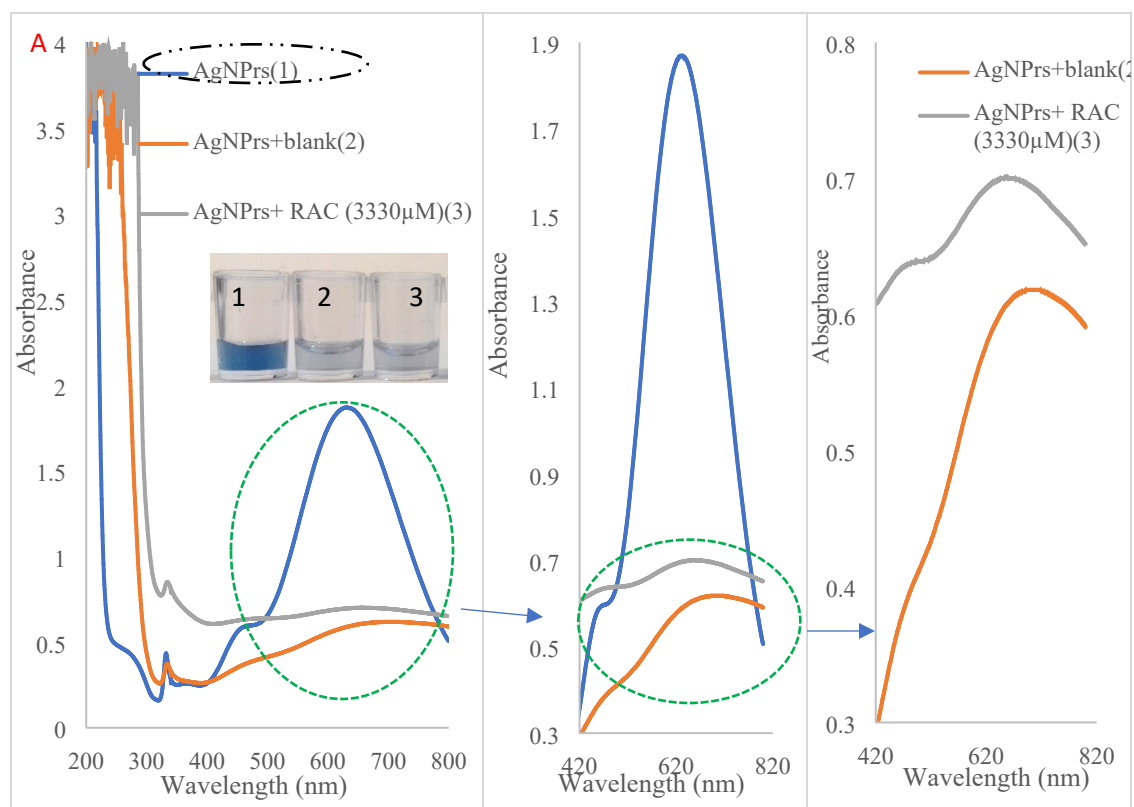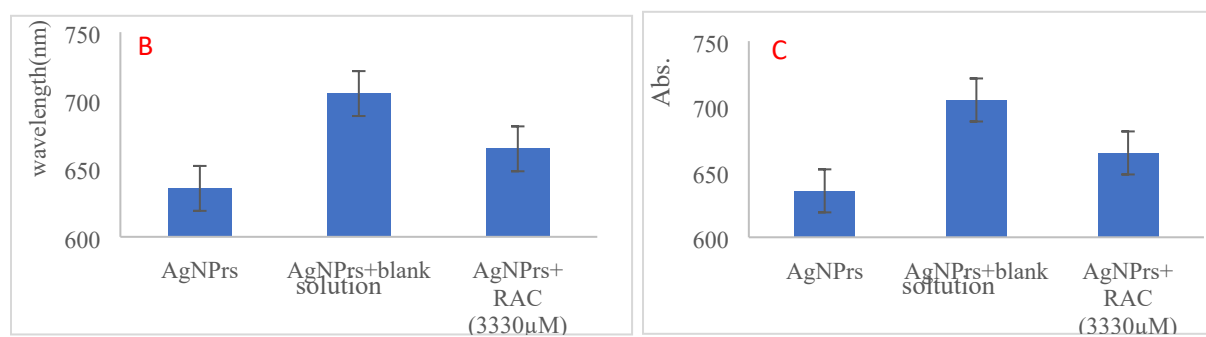

**Fig. S6.** A) digital photo and UV-Vis absorption response for, AgNPrs, blank (chicken extract) + AgNPrs, and AgNPrs+ RAC (3330 μM) B, C) comparison of corresponded wavelength and intensity of absorbance band.

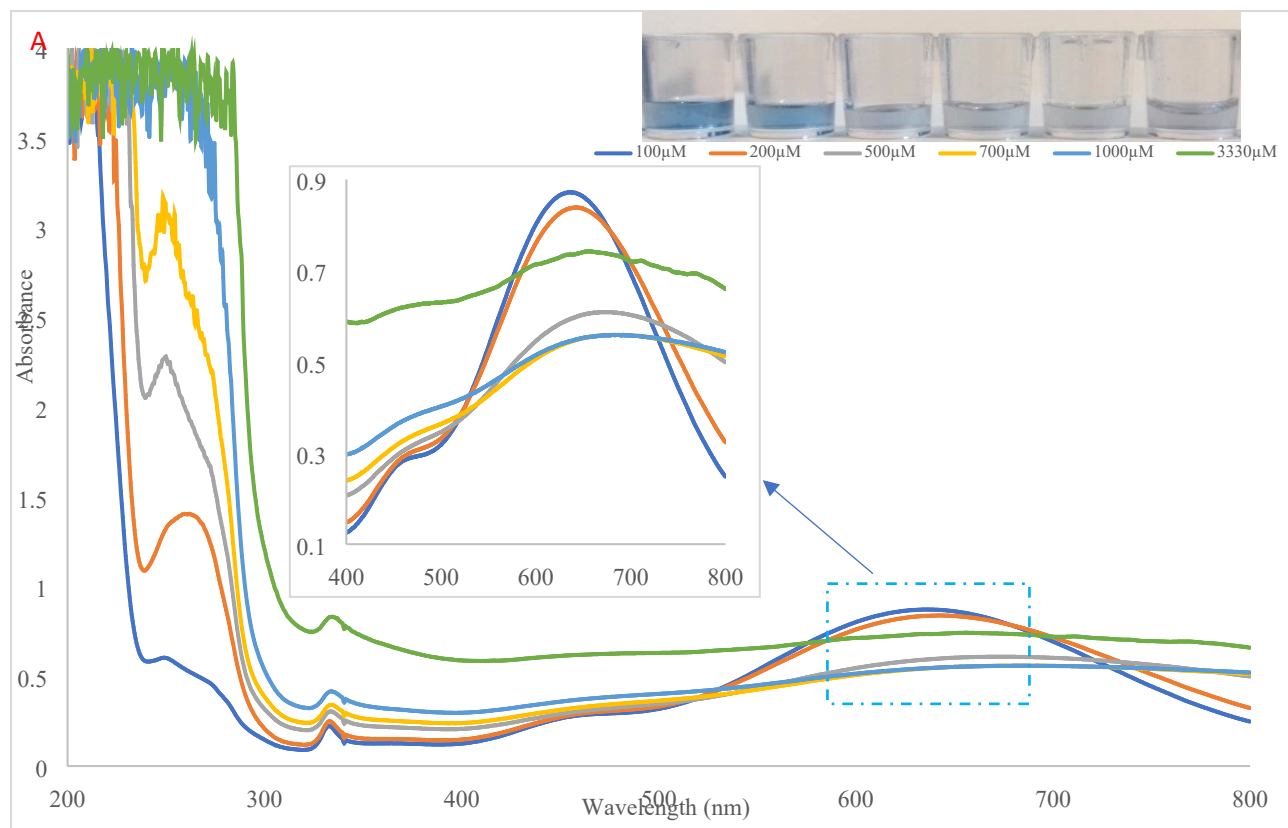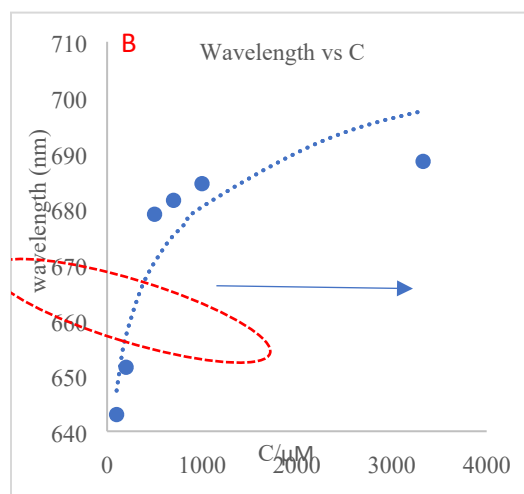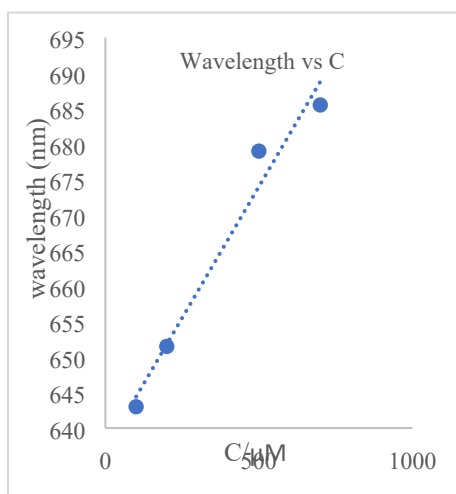

**Fig. S7.** A) UV-Vis spectrum for different concentrations of RAC in chicken sample inset: the related digital photograph B) related calibration curve.



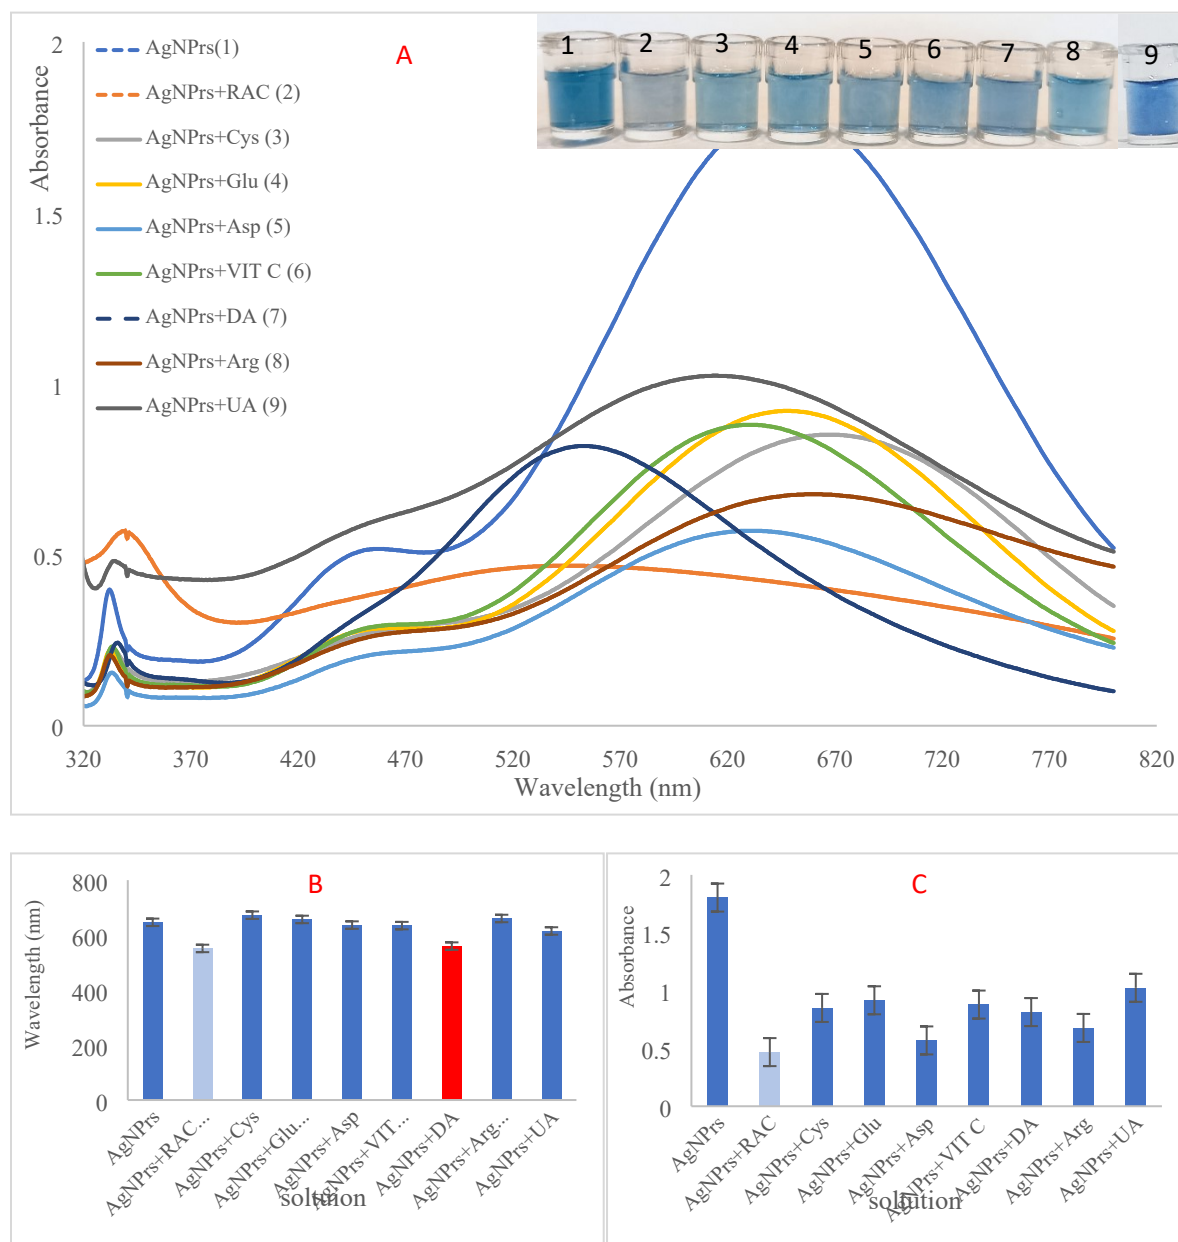

**Fig. S8.** A) Spectroscopic and photographic image of 1) AgNPrs, 2) AgNPrs/RAC, 3) AgNPrs/Cys, 4) AgNPrs/Glu, 5) AgNPrs/Asp, 6) AgNPrs/ VIT C, 7) AgNPrs/DA, 8) AgNPrs/Arg, 9) AgNPrs/UA the ratio of AgNPrs/Analyte was 1:1 V/V and the total volume of each solution was 200  $\mu$ L; B) the position and C) the intensity of the absorbance band for each

interference/AgNPrs in comparison with AgNPrs/RAC. The concentration of RAC and potential interferences were 0.01 M.

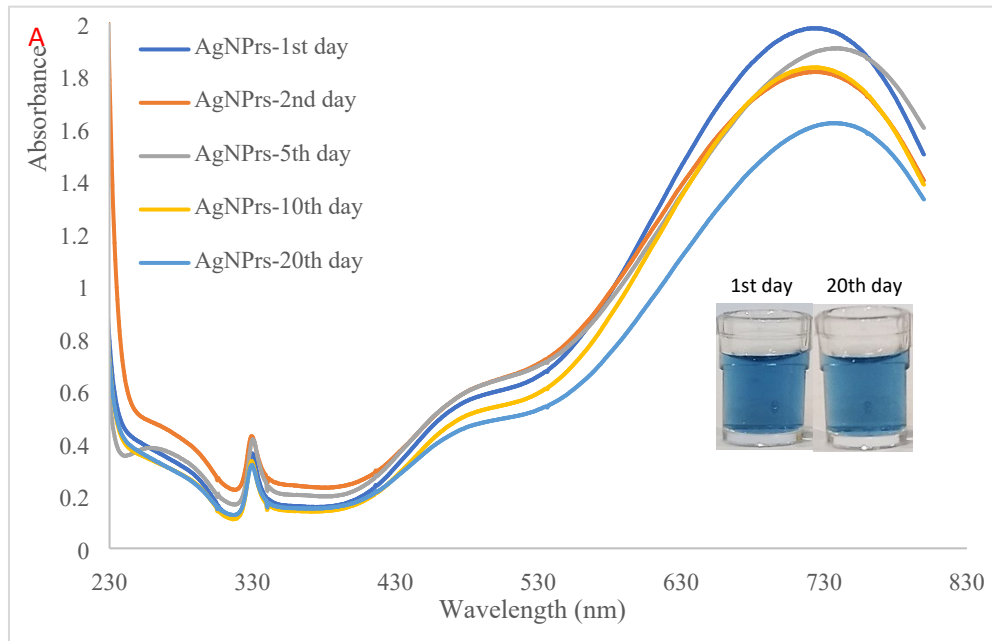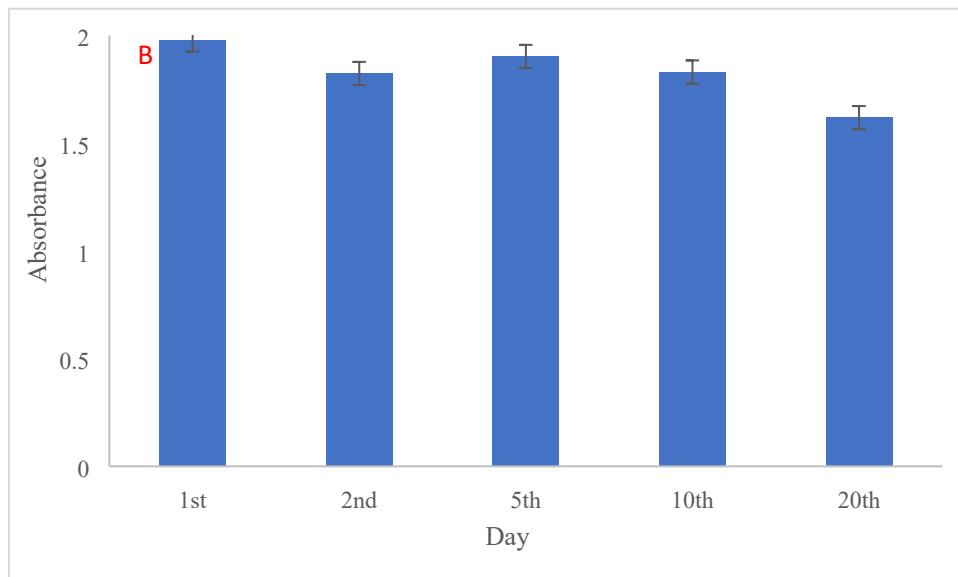

**Fi. S9.** A) spectroscopy of AgNPrs in 20 days period. inset: Digital photos of prepared AgNPrs on the 1<sup>st</sup> day and 20<sup>th</sup> day. B) comparison of the intensity of absorption band around 740 nm on different days.

**Table S1.** RGB codes and colors for items shown from Figs. 1 to S9

| Fig.         | item          | RGB code      | ~ color name         | Fig.          | item            | RGB code       | ~ color name         | Fig.             | item          | RGB code      | ~ color name     |                    |
|--------------|---------------|---------------|----------------------|---------------|-----------------|----------------|----------------------|------------------|---------------|---------------|------------------|--------------------|
| 1            | 1             | 29, 111, 154  | Sea Blue             | 3 (50 min)    | 0.01            | 72, 89, 114    | Marengo              | 6 (A)            | 7             | 152, 179, 217 | Jordy Blue       |                    |
|              | 2             | 104, 155, 174 | Moonstone Blue       |               | 10000 $\mu$ M   | 228, 219, 217  | Gainsboro            |                  | 8             | 151, 178, 212 | Jordy Blue       |                    |
|              | 3             | 206, 202, 190 | Pastel Gray          |               | 5000 $\mu$ M    | 246, 237, 216  | Parchment            |                  | 1             | 85, 126, 181  | Glaucous         |                    |
|              | 4             | 210, 202, 189 | Pastel Gray          |               | 1000 $\mu$ M    | 216, 203, 189  | Bone                 |                  | 2             | 226, 212, 201 | Almond           |                    |
|              | 5             | 135, 119, 104 | Almond Frost         |               | 500 $\mu$ M     | 175, 166, 144  | Grullo               |                  | 3             | 234, 190, 147 | Nude             |                    |
|              | 6             | 171, 159, 147 | Grullo               |               | 100 $\mu$ M     | 171, 162, 149  | Grullo               |                  | 4             | 217, 183, 173 | Chilean Pink     |                    |
| 1 (1h)       | 1             | 31, 94, 141   | Lapis Lazuli         |               | 50 $\mu$ M      | 118, 134, 153  | Light Slate Gray     |                  | 5             | 202, 180, 188 | Silver Pink      |                    |
|              | 2             | 142, 136, 143 | Taupe Gray           |               | 10 $\mu$ M      | 99, 132, 164   | Air Force Blue (RAF) |                  | 6             | 187, 186, 201 | Lavender Gray    |                    |
|              | 3             | 190, 187, 178 | Medium Gray          |               | 5 $\mu$ M       | 87, 122, 154   | Steel Blue           | 7                | 147, 176, 215 | Jordy Blue    |                  |                    |
|              | 4             | 200, 197, 190 | Pastel Gray          |               | 1 $\mu$ M       | 110, 136, 163  | Shadow Blue          | 8                | 147, 176, 208 | Jordy Blue    |                  |                    |
|              | 5             | 164, 162, 157 | Quick Silver         |               | 0.1 $\mu$ M     | 101, 128, 155  | Slate Gray           | 1                | 52, 72, 133   | Marian Blue   |                  |                    |
|              | 6             | 165, 151, 142 | Grullo               |               | 0.01 $\mu$ M    | 116, 137, 152  | Light Slate Gray     | 2                | 183, 169, 158 | Grullo        |                  |                    |
| 2            | 2             | 11, 107, 150  | Sea Blue             |               | 4 (2min)        | 1              | 48, 91, 123          | Lapis Lazuli     | 6 (B)         | 3             | 193, 163, 122    | Light French Beige |
|              | 3             | 125, 164, 177 | Pewter Blue          |               |                 | 2              | 136, 124, 125        | Taupe Gray       |               | 4             | 197, 167, 106    | Light French Beige |
|              | 4             | 221, 180, 143 | Nude                 |               |                 | 3              | 114, 135, 149        | Light Slate Gray |               | 5             | 213, 178, 116    | Burlywood          |
| 3 (0 min)    | 10000 $\mu$ M | 121, 139, 163 | Shadow Blue          |               |                 | 4              | 122, 135, 144        | Light Slate Gray |               | 6             | 216, 193, 136    | Lion               |
|              | 5000 $\mu$ M  | 100, 124, 157 | Glaucous             |               |                 | 5              | 111, 132, 145        | Slate Gray       |               | 7             | 211, 194, 153    | Lion               |
|              | 1000 $\mu$ M  | 93, 130, 163  | Air Force Blue (RAF) |               |                 | 6              | 106, 133, 150        | Slate Gray       |               | 8             | 120, 136, 171    | Wild Blue Yonder   |
|              | 500 $\mu$ M   | 76, 113, 144  | Queen Blue           | 7             |                 | 107, 133, 150  | Slate Gray           | 1                |               | 175, 174, 180 | Dark Gray        |                    |
|              | 100 $\mu$ M   | 83, 129, 166  | Steel Blue           | 8             |                 | 120, 138, 150  | Light Slate Gray     | 2                |               | 164, 141, 120 | Almond Frost     |                    |
|              | 50 $\mu$ M    | 78, 123, 156  | Steel Blue           | 9             |                 | 110, 135, 149  | Light Slate Gray     | 3                | 181, 164, 148 | Grullo        |                  |                    |
|              | 10 $\mu$ M    | 84, 124, 158  | Steel Blue           | 1             |                 | 35, 69, 116    | Dark Cerulean        | 4                | 191, 164, 146 | Pale Taupe    |                  |                    |
|              | 5 $\mu$ M     | 88, 125, 160  | Steel Blue           | 2             |                 | 172, 154, 125  | Grullo               | 5                | 207, 181, 105 | Vegas Gold    |                  |                    |
|              | 1 $\mu$ M     | 106, 139, 168 | Air Force Blue (RAF) | 3             |                 | 94, 123, 147   | Slate Gray           | 6                | 216, 185, 111 | Vegas Gold    |                  |                    |
|              | 0.1 $\mu$ M   | 114, 143, 169 | Shadow Blue          | 4             | 139, 133, 129   | Gray (Crayola) | 7                    | 208, 184, 130    | Sand          |               |                  |                    |
| 0.01 $\mu$ M | 126, 151, 172 | Shadow Blue   | 5                    | 135, 133, 134 | Battleship Gray | 8              | 202, 179, 120        | Sand             |               |               |                  |                    |
| 3 (30 min)   | 10000 $\mu$ M | 186, 147, 133 | Pale Taupe           | 4 (30min)     | 6               | 90, 122, 146   | Slate Gray           | 6 (C)            | 1             | 216, 199, 185 | Pale Silver      |                    |
|              | 5000 $\mu$ M  | 196, 149, 121 | Pale Taupe           |               | 7               | 85, 120, 145   | Slate Gray           |                  | 2             | 174, 193, 210 | Light Steel Blue |                    |
|              | 1000 $\mu$ M  | 166, 126, 121 | Burnished Brown      |               | 8               | 132, 132, 137  | Aluminum             |                  | 3             | 160, 179, 211 | Light Steel Blue |                    |
|              | 500 $\mu$ M   | 148, 114, 104 | Burnished Brown      |               | 9               | 99, 126, 146   | Slate Gray           |                  | 4             | 157, 176, 208 | Light Steel Blue |                    |
|              | 100 $\mu$ M   | 134, 110, 108 | Deep Taupe           |               | 1               | 88, 129, 183   | Glaucous             |                  | 5             | 213, 220, 223 | Gainsboro        |                    |
|              | 50 $\mu$ M    | 79, 96, 124   | Marengo              |               | 2               | 223, 211, 197  | Bone                 |                  | 6             | 173, 198, 226 | Light Steel Blue |                    |
|              | 10 $\mu$ M    | 51, 75, 110   | Dark Cerulean        |               | 3               | 229, 183, 145  | Nude                 |                  | 7             | 171, 194, 223 | Light Steel Blue |                    |
|              | 5 $\mu$ M     | 58, 82, 121   | Marian Blue          |               | 4               | 212, 177, 166  | Chilean Pink         |                  | 8             | 158, 183, 216 | Light Steel Blue |                    |
|              | 1 $\mu$ M     | 61, 77, 111   | Purple Navy          |               | 5               | 201, 181, 190  | Silver Pink          | 1                | 217, 200, 187 | Pale Silver   |                  |                    |
|              | 0.1 $\mu$ M   | 65, 75, 111   | Purple Navy          |               | 6               | 185, 183, 197  | Lavender Gray        | 2                | 190, 194, 202 | Lavender Gray |                  |                    |
| 3 (30 min)   | 0.1 $\mu$ M   | 65, 75, 111   | Purple Navy          | 5 (B)         | 6               | 185, 183, 197  | Lavender Gray        | 8 (B)            | 2             | 190, 194, 202 | Lavender Gray    |                    |

| Fig.  | item | RGB code      | ~ color name     | Fig.        | item  | RGB code      | ~ color name  | Fig.   | item          | RGB code       | ~ color name         |                      |
|-------|------|---------------|------------------|-------------|-------|---------------|---------------|--------|---------------|----------------|----------------------|----------------------|
| 8 (B) | 3    | 137, 153, 186 | Cool Gray        | 9 (A)       | 7     | 181, 167, 169 | Silver Pink   | S7     | 3             | 166, 167, 172  | Quick Silver         |                      |
|       | 4    | 160, 177, 206 | Light Steel Blue |             | 8     | 201, 178, 170 | Silver Pink   |        | 100           | 100, 142, 175  | Air Force Blue (RAF) |                      |
|       | 5    | 213, 216, 215 | Light Gray       |             | 1     | 197, 185, 171 | Pale Silver   |        | 200           | 105, 145, 173  | Air Force Blue (RAF) |                      |
|       | 6    | 185, 148, 175 | Glossy Grape     |             | 2     | 176, 181, 178 | Medium Gray   |        | 500           | 158, 168, 181  | Cadet Gray           |                      |
|       | 7    | 167, 160, 187 | Pastel Purple    |             | 3     | 225, 204, 169 | Lion          |        | 700           | 163, 169, 174  | Dark Gray            |                      |
|       | 8    | 122, 154, 197 | Dark Pastel Blue |             | 4     | 231, 214, 193 | Almond        |        | 1000          | 168, 169, 174  | Dark Gray            |                      |
| 8 (C) | 1    | 211, 192, 178 | Pale Silver      | 9 (B)       | 5     | 224, 212, 195 | Bone          | S8     | 3330          | 161, 162, 168  | Quick Silver         |                      |
|       | 2    | 202, 202, 200 | Neon Silver      |             | 6     | 223, 202, 157 | Lion          |        | 1             | 33, 109, 146   | Sea Blue             |                      |
|       | 3    | 172, 183, 207 | Light Steel Blue |             | 7     | 226, 205, 156 | Lion          |        | 2             | 157, 165, 171  | Cadet Gray           |                      |
|       | 4    | 247, 222, 182 | Wheat            |             | 8     | 218, 195, 154 | Lion          |        | 3             | 122, 155, 168  | Pewter Blue          |                      |
|       | 5    | 216, 219, 218 | Gainsboro        |             | 9 (C) | 1             | 190, 178, 165 |        | Pale Silver   | 4              | 112, 151, 169        | Air Superiority Blue |
|       | 6    | 211, 156, 165 | Pastel pink      |             |       | 2             | 183, 180, 173 |        | Medium Gray   | 5              | 119, 150, 168        | Air Superiority Blue |
|       | 7    | 201, 171, 176 | Silver Pink      |             |       | 3             | 216, 197, 167 |        | Khaki         | 6              | 114, 148, 169        | Air Force Blue (RAF) |
|       | 8    | 118, 138, 175 | Wild Blue Yonder |             |       | 4             | 218, 196, 179 |        | Desert Sand   | 7              | 119, 149, 169        | Air Superiority Blue |
| 9 (A) | 1    | 198, 181, 165 | Pale Silver      | 5           |       | 211, 193, 176 | Pale Silver   | 8      | 119, 163, 184 | Moonstone Blue |                      |                      |
|       | 2    | 186, 198, 203 | Pastel Blue      | 6           |       | 216, 192, 145 | Lion          | 9      | 83, 136, 192  | Steel Blue     |                      |                      |
|       | 3    | 222, 201, 189 | Almond           | 7           |       | 213, 192, 155 | Tan           | S9 (A) | 1st day       | 45, 100, 143   | Lapis Lazuli         |                      |
|       | 4    | 233, 210, 181 | Almond           | 8           |       | 210, 186, 151 | Tan           |        | 20th day      | 57, 112, 151   | Bice Blue            |                      |
|       | S6   | 5             | 226, 205, 185    | Almond      | 1     | 50, 96, 144   | Lapis Lazuli  |        |               |                |                      |                      |
|       |      | 6             | 232, 200, 173    | Desert Sand | 2     | 163, 164, 170 | Quick Silver  |        |               |                |                      |                      |
